# Supplementary material for: Two-dimensional Janus pentagonal MSeTe (M = Ni, Pd, Pt): promising water-splitting photocatalysts and optoelectronic materials
Source: Royal Society of Chemistry journal article supplement (doi:10.1039/d3cp02398b), 2023-01-01
Supplement: d3cp02398b1.pdf [file d3cp02398b1.pdf]

## Supporting information for

# Two-dimensional Janus pentagonal MSeTe (M = Ni, Pd, Pt): promising water-splitting photocatalysts and opto-electronic materials

Yu-Xun Yuan<sup>1</sup>, Lu Pan<sup>1</sup>, Zhao-Qi Wang<sup>2,\*</sup>, Zhao-Yi Zeng<sup>3</sup>, Hua-Yun Geng<sup>4</sup>, Xiang-Rong Chen

<sup>1,\*</sup>

<sup>1</sup> College of Physics, Sichuan University, Chengdu 610064, China;

<sup>2</sup> College of Science, Xian University of Science and Technology, Xian 710054, China;

<sup>3</sup> College of Physics and Electronic Engineering, Chongqing Normal University, Chongqing

400047, China;

<sup>4</sup> National Key Laboratory for Shock Wave and Detonation Physics Research, Institute of Fluid

Physics, CAEP, Mianyang 621900, China

## ABSTRACT

Inspired by the interesting and novel properties exhibited by Janus transition metal dichalcogenides (TMDs) and two-dimensional pentagonal structures, we here investigated the structural stability, mechanical, electronic photocatalytic, and optical properties for a class of two-dimensional (2D) pentagonal Janus TMDs, namely penta-MSeTe (M = Ni, Pd, Pt) monolayers, by using density functional theory (DFT) combined with Hubbard's correction ( $U$ ). Our results showed that these monolayers exhibit well structural stability, proper band structures for photocatalysts, high visible light absorption, and good photocatalytic applicability. The calculated electronic properties reveal that the penta-MSeTe are semiconductors with bandgap range of 2.06-2.39 eV, and their band edge positions meet the requirements for water-splitting photocatalysts in various environment (pH = 0-13). We used stress engineering to seek

---

\* Corresponding authors. E-mail: zhqwangsc@foxmail.com; xrchen@scu.edu.cn

higher solar-to-hydrogen (STH) efficiency in acidic (pH=0), neutral (pH=7) and alkaline (pH=13) environments for penta-MSeTe through 0% to +8% biaxial and uniaxial strain. Our results showed that penta-PdSeTe stretched 8% along  $y$  direction demonstrates STH efficiency as high as 29.71% when pH=0, which break the theoretical limit of conventional photocatalytic model. We also calculated the optical properties and found that they exhibit high absorption (13.11%) in the visible light range and own diverse range of hyperbolic regions. Hence, it is anticipated that penta-MSeTe materials hold great promise for applications in photocatalytic water splitting and optoelectronic devices.

**Keywords:** First-principles calculations; Transition metal dichalcogenides; Pentagonal Janus monolayers; Photocatalytic water splitting; Strain engineering.

**Table S1** Elastic constants ( $C_{11}, C_{22}, C_{12}, C_{66}$ ) and Young's modulus ( $Y_x, Y_y$ : the  $Y$  value along the x, y direction) of the penta-MSeTe (M = Ni, Pd, Pt) monolayers.

| Materials | $C_{11}(Nm^{-1})$  | $C_{22}(Nm^{-1})$ | $C_{12}(Nm^{-1})$ | $C_{66}(Nm^{-1})$ | $Y_x(Nm^{-1})$ | $Y_y(Nm^{-1})$ |
|-----------|--------------------|-------------------|-------------------|-------------------|----------------|----------------|
| NiSeTe    | 24.25              | 62.88             | -3.29             | 25.35             | 24.08          | 62.44          |
| PdSeTe    | 27.70 <sup>8</sup> | 53.61             | 0.073             | 18.16             | 27.70          | 53.61          |
| PtSeTe    | 35.46              | 65.57             | 0.80              | 23.29             | 35.45          | 65.55          |

**Table S2** The band gaps and band edges information of the penta-MSeTe (M = Ni, Pd, Pt) using various methods. Energy is in eV and had been deducted Fermi energy.

| Materials | $E_{gap}^{PBE}$ | $E_{CBM}^{PBE}$ | $E_{VBM}^{PBE}$ | $E_{gap}^{PBE+SC}$ | $E_{CBM}^{PBE+SC}$ | $E_{VBM}^{PBE+SO}$ | $E_{gap}^{HSEC}$ | $E_{CBM}^{HSEC}$ | $E_{VBM}^{HSEC}$ | $E_{gap}^{HSEC06+SC}$ | $E_{CBM}^{HSEC06+SC}$ | $E_{VBM}^{HSEC06+SO}$ |
|-----------|-----------------|-----------------|-----------------|--------------------|--------------------|--------------------|------------------|------------------|------------------|-----------------------|-----------------------|-----------------------|
| NiSeTe    | 0.97            | -2.17           | -3.14           | 0.90               | -2.18              | -3.08              | 2.05             | -1.94            | -3.99            | 1.98                  | -1.96                 | -3.94                 |
| NiSeTe+U  | 1.39            | -2.05           | -3.44           | 1.26               | -2.12              | -3.38              | 2.39             | -1.70            | -4.09            | 2.30                  | -1.72                 | -4.02                 |
| PdSeTe    | 1.30            | -2.01           | -3.31           | 1.22               | -2.03              | -3.25              | 2.04             | -1.86            | -3.90            | 1.97                  | -1.89                 | -3.86                 |
| PdSeTe+U  | 1.33            | -2.01           | -3.34           | 1.27               | -2.01              | -3.28              | 2.07             | -1.85            | -3.92            | 2.00                  | -1.88                 | -3.88                 |
| PtSeTe    | 1.42            | -1.89           | -3.31           | 1.21               | -2.04              | -3.25              | 2.03             | -1.88            | -3.91            | 2.13                  | -1.69                 | -3.82                 |
| PtSeTe+U  | 1.49            | -1.86           | -3.35           | 1.34               | -1.71              | -3.05              | 2.30             | -1.64            | -3.94            | 2.22                  | -1.65                 | -3.87                 |

**Table S3** The band gap ( $E_{gap}$ ), the difference of the electrostatic potential ( $\Delta\Phi$ ), CBM ( $E_{CBM}$ ) and VBM ( $E_{VBM}$ ) refer to the vacuum level, over-potential for hydrogen evolution reaction  $\chi(H_2)$ , the over-Potential for oxygen evolution reaction  $\chi(O_2)$ , energy conversion efficiency of light absorption ( $\eta_{abs}$ ), carrier utilization ( $\eta_{cu}$ ) and STH ( $\eta_{STH}$ ) efficiency in acidic (pH = 0) environment.

| Materials      |             | $E_{gap}$ | $\Delta\Phi$ | $E_{CBM}$ | $E_{VBM}$ | $\chi(H_2)$ | $\chi(O_2)$ | $\eta_{abs}$ | $\eta_{cu}$ | $\eta_{STH}$ |
|----------------|-------------|-----------|--------------|-----------|-----------|-------------|-------------|--------------|-------------|--------------|
|                |             | (eV)      | (eV)         | (eV)      | (eV)      | (eV)        | (eV)        | (%)          | (%)         | (%)          |
| Biaxial Strain | NiSeTe (0%) | 2.386     | 0.373        | -3.829    | -6.215    | 0.984       | 0.545       | 21.59        | 39.60       | 8.55         |
|                | NiSeTe (2%) | 2.322     | 0.344        | -3.916    | -6.238    | 0.868       | 0.568       | 23.74        | 42.23       | 10.03        |
|                | NiSeTe (4%) | 2.126     | 0.317        | -4.141    | -6.267    | 0.616       | 0.597       | 31.17        | 46.90       | 14.62        |
|                | NiSeTe (6%) | 1.961     | 0.291        | -4.341    | -6.302    | 0.390       | 0.632       | 38.29        | 49.61       | 18.99        |
|                | NiSeTe (8%) | 1.817     | 0.266        | -4.511    | -6.328    | 0.195       | 0.658       | 45.31        | 51.81       | 23.47        |
|                | PdSeTe (0%) | 2.068     | 0.409        | -4.024    | -6.092    | 0.825       | 0.422       | 33.66        | 35.90       | 12.08        |
|                | PdSeTe (2%) | 1.815     | 0.384        | -4.300    | -6.115    | 0.524       | 0.445       | 45.44        | 41.22       | 18.73        |
|                | PdSeTe (4%) | 1.538     | 0.361        | -4.607    | -6.145    | 0.194       | 0.475       | 59.54        | 48.37       | 28.80        |
|                | PtSeTe (0%) | 2.297     | 0.422        | -3.882    | -6.179    | 0.980       | 0.509       | 24.67        | 38.08       | 9.40         |
|                | PtSeTe (2%) | 2.212     | 0.401        | -4.006    | -6.218    | 0.835       | 0.548       | 27.88        | 42.14       | 11.75        |
|                | PtSeTe (4%) | 2.093     | 0.382        | -4.172    | -6.264    | 0.650       | 0.594       | 32.49        | 47.37       | 15.39        |
|                | PtSeTe (6%) | 1.851     | 0.365        | -4.466    | -6.317    | 0.339       | 0.647       | 43.62        | 51.01       | 22.25        |
| X Strain       | NiSeTe (2%) | 2.383     | 0.346        | -3.862    | -6.245    | 0.924       | 0.575       | 21.59        | 42.15       | 9.10         |
|                | NiSeTe (4%) | 2.339     | 0.329        | -3.931    | -6.270    | 0.838       | 0.600       | 23.12        | 44.40       | 10.27        |
|                | NiSeTe (6%) | 2.243     | 0.313        | -4.050    | -6.293    | 0.703       | 0.623       | 26.66        | 45.64       | 12.17        |
|                | NiSeTe (8%) | 2.144     | 0.297        | -4.165    | -6.309    | 0.572       | 0.639       | 30.42        | 46.93       | 14.27        |
|                | PdSeTe (2%) | 1.965     | 0.433        | -4.156    | -6.121    | 0.717       | 0.451       | 38.14        | 39.49       | 15.06        |
|                | PdSeTe (4%) | 1.827     | 0.419        | -4.308    | -6.135    | 0.551       | 0.465       | 44.89        | 42.31       | 18.99        |
|                | PdSeTe (6%) | 1.690     | 0.406        | -4.463    | -6.153    | 0.383       | 0.483       | 51.62        | 46.38       | 23.94        |
|                | PdSeTe (8%) | 1.553     | 0.394        | -4.617    | -6.169    | 0.217       | 0.499       | 58.57        | 50.18       | 29.44        |
|                | PtSeTe (2%) | 2.276     | 0.445        | -3.928    | -6.204    | 0.957       | 0.534       | 25.43        | 40.05       | 10.18        |
|                | PtSeTe (4%) | 2.246     | 0.432        | -3.975    | -6.221    | 0.897       | 0.551       | 26.51        | 41.83       | 11.09        |
|                | PtSeTe (6%) | 2.207     | 0.419        | -4.031    | -6.237    | 0.828       | 0.567       | 28.03        | 43.71       | 12.25        |

|          |             |       |       |        |        |       |       |       |       |       |
|----------|-------------|-------|-------|--------|--------|-------|-------|-------|-------|-------|
|          | PtSeTe (8%) | 2.155 | 0.407 | -4.098 | -6.252 | 0.749 | 0.582 | 29.97 | 45.64 | 13.68 |
| Y Strain | NiSeTe (2%) | 2.335 | 0.346 | -3.887 | -6.222 | 0.899 | 0.552 | 23.28 | 40.68 | 9.47  |
|          | NiSeTe (4%) | 2.244 | 0.329 | -3.972 | -6.216 | 0.797 | 0.546 | 26.66 | 41.59 | 11.09 |
|          | NiSeTe (6%) | 2.151 | 0.315 | -4.059 | -6.211 | 0.700 | 0.541 | 30.12 | 42.62 | 12.83 |
|          | NiSeTe (8%) | 2.045 | 0.303 | -4.149 | -6.194 | 0.594 | 0.524 | 34.54 | 43.10 | 14.89 |
|          | PdSeTe (2%) | 1.948 | 0.435 | -4.160 | -6.108 | 0.715 | 0.438 | 38.99 | 38.85 | 15.15 |
|          | PdSeTe (4%) | 1.795 | 0.423 | -4.315 | -6.110 | 0.548 | 0.440 | 46.42 | 41.30 | 19.17 |
|          | PdSeTe (6%) | 1.642 | 0.414 | -4.470 | -6.112 | 0.384 | 0.442 | 54.19 | 44.59 | 24.17 |
|          | PdSeTe (8%) | 1.489 | 0.407 | -4.624 | -6.113 | 0.223 | 0.443 | 62.08 | 47.87 | 29.71 |
|          | PtSeTe (2%) | 2.235 | 0.450 | -3.974 | -6.209 | 0.916 | 0.539 | 26.97 | 41.11 | 11.09 |
|          | PtSeTe (4%) | 2.139 | 0.443 | -4.090 | -6.229 | 0.793 | 0.559 | 30.71 | 44.00 | 13.51 |
|          | PtSeTe (6%) | 2.022 | 0.438 | -4.227 | -6.250 | 0.651 | 0.580 | 35.57 | 47.18 | 16.78 |
|          | PtSeTe (8%) | 1.896 | 0.437 | -4.375 | -6.271 | 0.502 | 0.601 | 41.42 | 50.68 | 20.99 |

---

**Table S4** The band gap ( $E_{gap}$ ), the difference of the electrostatic potential ( $\Delta\Phi$ ), CBM ( $E_{CBM}$ ) and VBM ( $E_{VBM}$ ) refer to the vacuum level, over-potential for hydrogen evolution reaction  $\chi(H_2)$ , the over-Potential for oxygen evolution reaction  $\chi(O_2)$ , energy conversion efficiency of light absorption ( $\eta_{abs}$ ), carrier utilization ( $\eta_{cu}$ ) and STH ( $\eta_{STH}$ ) efficiency in neutral (pH = 7) environment.

| Materials      |             | $E_{gap}$ | $\Delta\Phi$ | $E_{CBM}$ | $E_{VBM}$ | $\chi(H_2)$ | $\chi(O_2)$ | $\eta_{abs}$ | $\eta_{cu}$ | $\eta_{STH}$ |
|----------------|-------------|-----------|--------------|-----------|-----------|-------------|-------------|--------------|-------------|--------------|
|                |             | (eV)      | (eV)         | (eV)      | (eV)      | (eV)        | (eV)        | (%)          | (%)         | (%)          |
| Biaxial Strain | NiSeTe (0%) | 2.386     | 0.373        | -3.829    | -6.215    | 0.571       | 0.958       | 21.59        | 43.86       | 9.47         |
|                | NiSeTe (2%) | 2.322     | 0.344        | -3.916    | -6.238    | 0.455       | 0.981       | 23.74        | 44.62       | 10.59        |
|                | NiSeTe (4%) | 2.126     | 0.317        | -4.141    | -6.267    | 0.203       | 1.010       | 31.17        | 47.18       | 14.71        |
|                | PdSeTe (0%) | 2.068     | 0.409        | -4.024    | -6.092    | 0.412       | 0.835       | 33.66        | 48.03       | 16.17        |
|                | PdSeTe (2%) | 1.815     | 0.384        | -4.300    | -6.115    | 0.111       | 0.858       | 45.44        | 45.59       | 20.72        |
|                | PtSeTe (0%) | 2.297     | 0.422        | -3.882    | -6.179    | 0.567       | 0.922       | 24.67        | 44.95       | 11.09        |
|                | PtSeTe (2%) | 2.212     | 0.401        | -4.006    | -6.218    | 0.422       | 0.961       | 27.88        | 46.06       | 12.84        |
|                | PtSeTe (4%) | 2.093     | 0.382        | -4.172    | -6.264    | 0.237       | 1.007       | 32.49        | 47.64       | 15.48        |
| X Strain       | NiSeTe (2%) | 2.383     | 0.346        | -3.862    | -6.245    | 0.511       | 0.988       | 21.59        | 43.86       | 9.47         |
|                | NiSeTe (4%) | 2.339     | 0.329        | -3.931    | -6.270    | 0.425       | 1.013       | 23.12        | 44.40       | 10.26        |
|                | NiSeTe (6%) | 2.243     | 0.313        | -4.050    | -6.293    | 0.290       | 1.036       | 26.66        | 45.64       | 12.17        |
|                | NiSeTe (8%) | 2.144     | 0.297        | -4.165    | -6.309    | 0.159       | 1.052       | 30.42        | 42.87       | 13.34        |
|                | PdSeTe (2%) | 1.965     | 0.433        | -4.156    | -6.121    | 0.304       | 0.864       | 38.14        | 49.56       | 18.91        |
|                | PdSeTe (4%) | 1.827     | 0.419        | -4.308    | -6.135    | 0.138       | 0.878       | 44.89        | 47.33       | 21.24        |
|                | PtSeTe (2%) | 2.276     | 0.445        | -3.928    | -6.204    | 0.544       | 0.947       | 25.43        | 45.21       | 11.50        |
|                | PtSeTe (4%) | 2.246     | 0.432        | -3.975    | -6.221    | 0.484       | 0.964       | 26.51        | 45.58       | 12.08        |
|                | PtSeTe (6%) | 2.207     | 0.419        | -4.031    | -6.237    | 0.415       | 0.980       | 28.03        | 46.11       | 12.92        |
|                | PtSeTe (8%) | 2.155     | 0.407        | -4.098    | -6.252    | 0.336       | 0.995       | 29.97        | 46.78       | 14.02        |
| Y Strain       | NiSeTe (2%) | 2.335     | 0.346        | -3.887    | -6.222    | 0.486       | 0.965       | 23.28        | 44.46       | 10.35        |
|                | NiSeTe (4%) | 2.244     | 0.329        | -3.972    | -6.216    | 0.384       | 0.959       | 26.66        | 45.64       | 12.17        |
|                | NiSeTe (6%) | 2.151     | 0.315        | -4.059    | -6.211    | 0.283       | 0.954       | 30.12        | 46.83       | 14.11        |
|                | NiSeTe (8%) | 2.045     | 0.303        | -4.149    | -6.194    | 0.181       | 0.937       | 34.54        | 47.06       | 16.25        |
|                | PdSeTe (2%) | 1.948     | 0.435        | -4.160    | -6.108    | 0.302       | 0.851       | 39.00        | 49.86       | 19.44        |

|             |       |       |        |        |       |       |       |       |       |
|-------------|-------|-------|--------|--------|-------|-------|-------|-------|-------|
| PdSeTe (4%) | 1.795 | 0.423 | -4.315 | -6.110 | 0.135 | 0.853 | 46.42 | 47.73 | 22.16 |
| PtSeTe (2%) | 2.235 | 0.450 | -3.974 | -6.209 | 0.503 | 0.952 | 26.97 | 45.74 | 12.34 |
| PtSeTe (4%) | 2.139 | 0.443 | -4.090 | -6.229 | 0.380 | 0.972 | 30.71 | 47.03 | 14.44 |
| PtSeTe (6%) | 2.022 | 0.438 | -4.227 | -6.250 | 0.238 | 0.993 | 35.57 | 48.69 | 17.32 |
| PtSeTe (8%) | 1.896 | 0.437 | -4.375 | -6.271 | 0.089 | 1.014 | 41.42 | 42.87 | 17.76 |

---



**Table S5** The band gap ( $E_{gap}$ ), the difference of the electrostatic potential ( $\Delta\Phi$ ), CBM ( $E_{CBM}$ ) and VBM ( $E_{VBM}$ ) refer to the vacuum level, over-potential for hydrogen evolution reaction  $\chi(H_2)$ , the over-Potential for oxygen evolution reaction  $\chi(O_2)$ , energy conversion efficiency of light absorption ( $\eta_{abs}$ ), carrier utilization ( $\eta_{cu}$ ) and STH ( $\eta_{STH}$ ) efficiency in alkaline (pH = 13) environment.

| Materials      |             | $E_{gap}$ | $\Delta\Phi$ | $E_{CBM}$ | $E_{VBM}$ | $\chi(H_2)$ | $\chi(O_2)$ | $\eta_{abs}$ | $\eta_{cu}$ | $\eta_{STH}$ |
|----------------|-------------|-----------|--------------|-----------|-----------|-------------|-------------|--------------|-------------|--------------|
|                |             | (eV)      | (eV)         | (eV)      | (eV)      | (eV)        | (eV)        | (%)          | (%)         | (%)          |
| Biaxial Strain | NiSeTe (0%) | 2.386     | 0.217        | -3.829    | -6.215    | 0.217       | 1.312       | 21.59        | 43.86       | 9.47         |
|                | NiSeTe(2%)  | 2.322     | 0.101        | -3.916    | -6.238    | 0.101       | 1.335       | 23.74        | 37.36       | 8.87         |
|                | PdSeTe (0%) | 2.068     | 0.409        | -4.024    | -6.092    | 0.058       | 1.189       | 33.66        | 38.14       | 12.84        |
|                | PtSeTe (0%) | 2.297     | 0.422        | -3.882    | -6.179    | 0.213       | 1.276       | 24.67        | 44.95       | 11.09        |
|                | PtSeTe(2%)  | 2.212     | 0.401        | -4.006    | -6.218    | 0.068       | 1.315       | 27.88        | 36.53       | 10.18        |
| X Strain       | NiSeTe (2%) | 2.383     | 0.346        | -3.862    | -6.245    | 0.157       | 1.342       | 21.59        | 40.70       | 8.79         |
|                | NiSeTe (4%) | 2.339     | 0.329        | -3.931    | -6.270    | 0.071       | 1.367       | 23.12        | 34.97       | 8.09         |
|                | PtSeTe (2%) | 2.276     | 0.445        | -3.928    | -6.204    | 0.190       | 1.301       | 25.43        | 44.55       | 11.33        |
|                | PtSeTe (4%) | 2.246     | 0.432        | -3.975    | -6.221    | 0.130       | 1.318       | 26.51        | 40.28       | 10.68        |
|                | PtSeTe (6%) | 2.207     | 0.419        | -4.031    | -6.237    | 0.061       | 1.334       | 28.03        | 36.04       | 10.10        |
| Y Strain       | NiSeTe (2%) | 2.335     | 0.346        | -3.887    | -6.222    | 0.132       | 1.319       | 23.28        | 39.44       | 9.18         |
|                | NiSeTe (4%) | 2.244     | 0.329        | -3.972    | -6.216    | 0.030       | 1.313       | 26.66        | 33.85       | 9.03         |
|                | PtSeTe (2%) | 2.235     | 0.450        | -3.974    | -6.209    | 0.149       | 1.306       | 26.97        | 41.70       | 11.25        |
|                | PtSeTe (4%) | 2.139     | 0.443        | -4.090    | -6.229    | 0.026       | 1.326       | 30.71        | 35.03       | 10.76        |

**Table S6** The calculated deformation potential ( $E_I$ ), elastic modulus ( $C^{2D}$ ), effective mass ( $m^*$ ), mobility ( $\mu$ ), and relaxation time ( $\tau$ ) of the penta-MSeTe (M = Ni, Pd, Pt) at 300 K along x and y directions for hole and electron.

| Materials | Direction | Carrier  | $E_I$ (eV) | $C^{2D}$ (N/m) | $m^*(m_0)$ | $\mu(\text{cm}^2\text{s}^{-1}\text{V}^{-1})$ | $\tau(\text{fs})$ |
|-----------|-----------|----------|------------|----------------|------------|----------------------------------------------|-------------------|
| NiSeTe    | x         | Electron | 15.26      | 22.78          | 1.83       | 1.24                                         | 1.29              |
|           |           | Hole     | 2.46       | 22.78          | 0.68       | 53.13                                        | 20.54             |
|           | y         | Electron | 19.34      | 56.95          | 0.46       | 7.68                                         | 2.00              |
|           |           | Hole     | 2.29       | 56.95          | 7.24       | 14.39                                        | 59.27             |
| PdSeTe    | x         | Electron | 3.48       | 28.21          | 1.07       | 51.64                                        | 31.46             |
|           |           | Hole     | 2.55       | 28.21          | 0.64       | 151.93                                       | 55.16             |
|           | y         | Electron | 3.64       | 54.39          | 0.75       | 130.02                                       | 55.44             |
|           |           | Hole     | 2.28       | 54.39          | 1.42       | 164.79                                       | 133.04            |
| PtSeTe    | x         | Electron | 3.36       | 35.70          | 1.62       | 44.86                                        | 41.32             |
|           |           | Hole     | 2.59       | 35.70          | 0.55       | 266.98                                       | 83.49             |
|           | y         | Electron | 5.06       | 65.70          | 0.53       | 111.28                                       | 33.53             |
|           |           | Hole     | 2.96       | 65.70          | 1.08       | 191.07                                       | 117.65            |

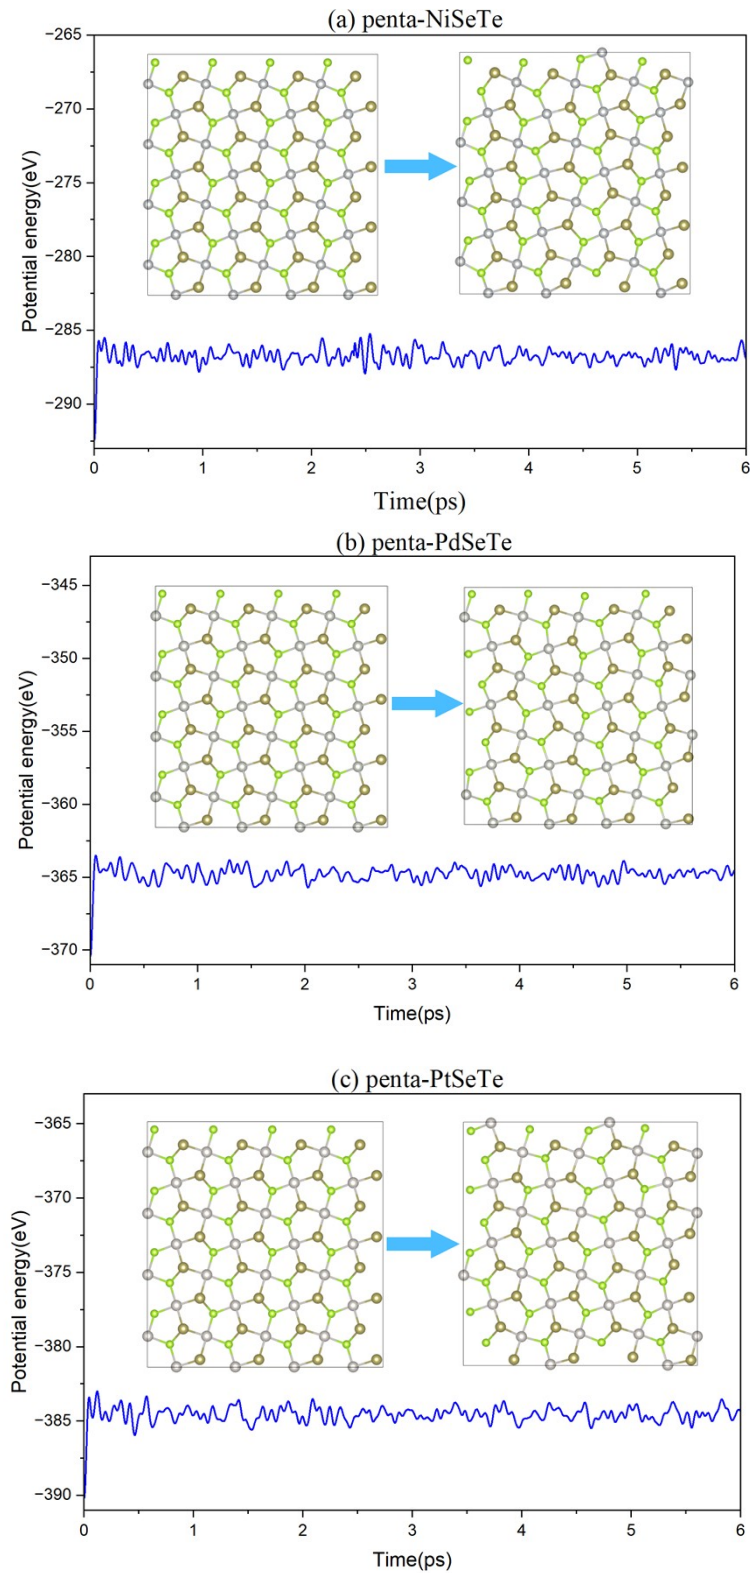

**Figure S1** Potential energy fluctuations of (a) penta-NiSeTe, (b) penta-PdSeTe, (c) penta-PtSeTe monolayers from AIMD simulations ( $4 \times 4 \times 1$  supercell) at 900 K, and snapshots of initial and final structures at 0 and 6 ps.

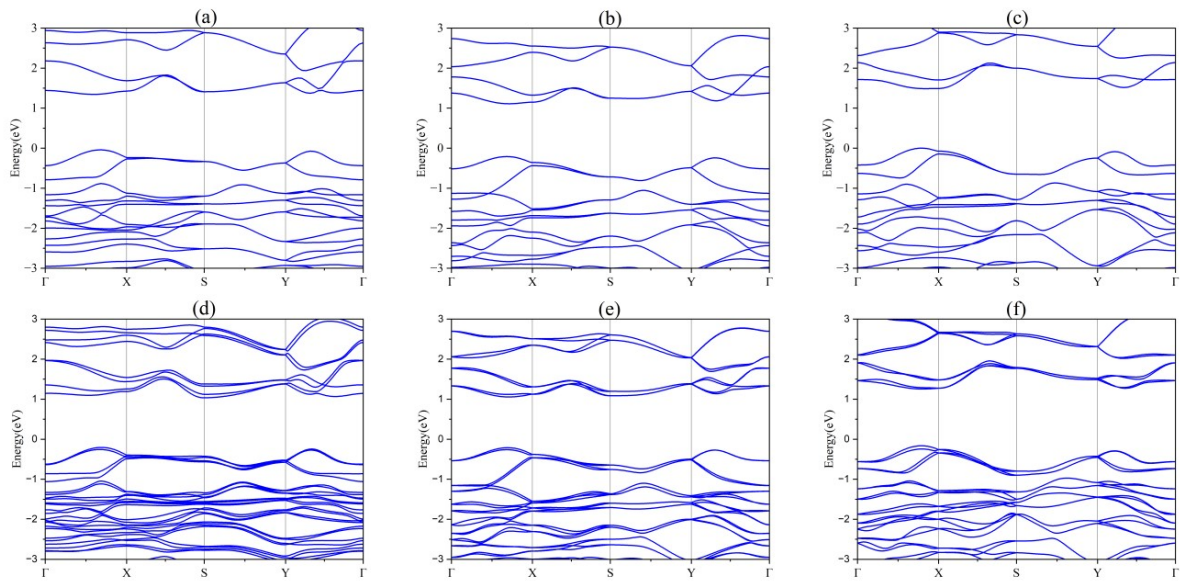

**Figure S2** Band structures of (a) penta-NiSeTe, (b) penta-PdSeTe, (c) penta-PtSeTe at the PBE level and band structures of (d) penta-NiSeTe, (e) penta-PdSeTe, (f) penta-PtSeTe at the PBE+SOC level.

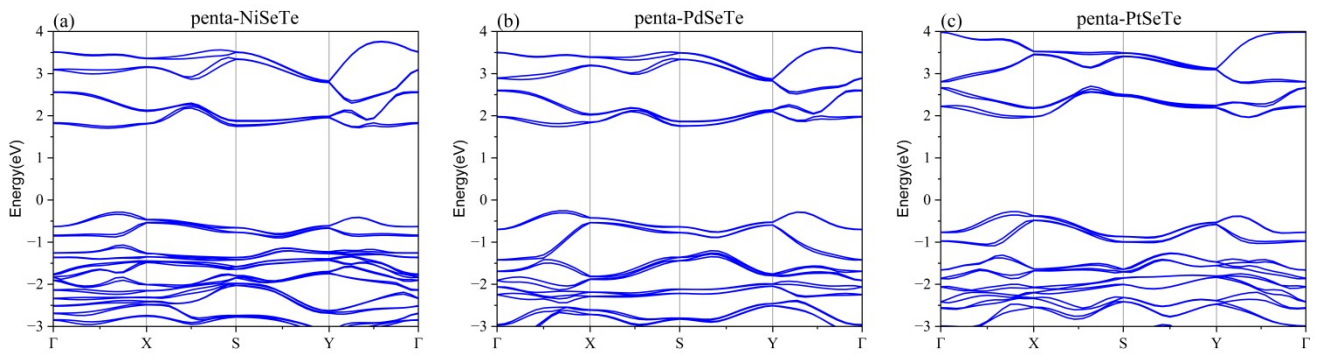

**Figure S3** Band structures of (a) penta-NiSeTe, (b) penta-PdSeTe, (c) penta-PtSeTe at the HSE06+SOC level.

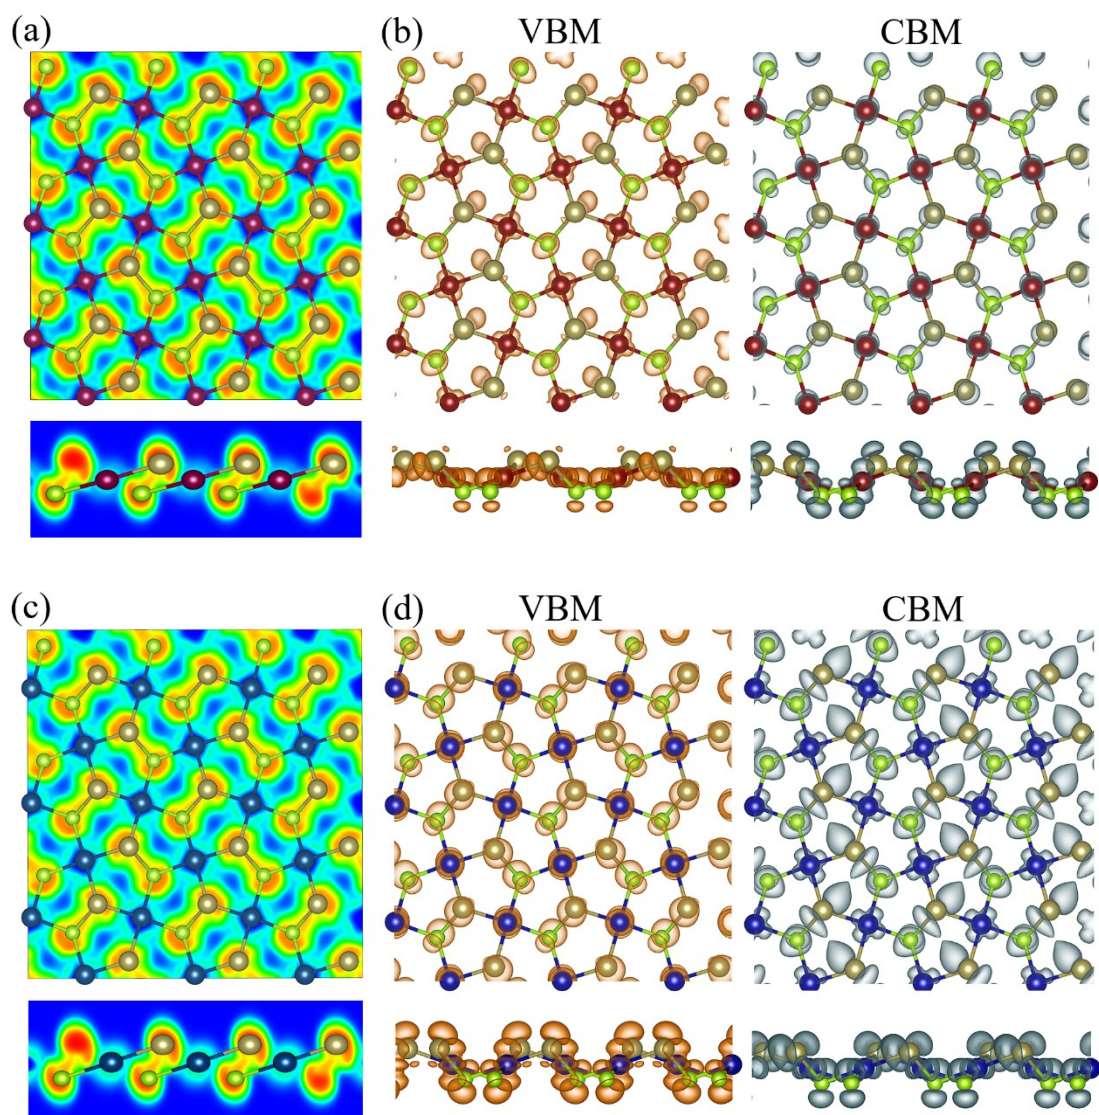

**Figure S4** (a) (c) electron localization function and (b) (d) partial charge densities of the VBM (left) and CBM (right) for penta-NiSeTe and penta-PdSeTe monolayers respectively.

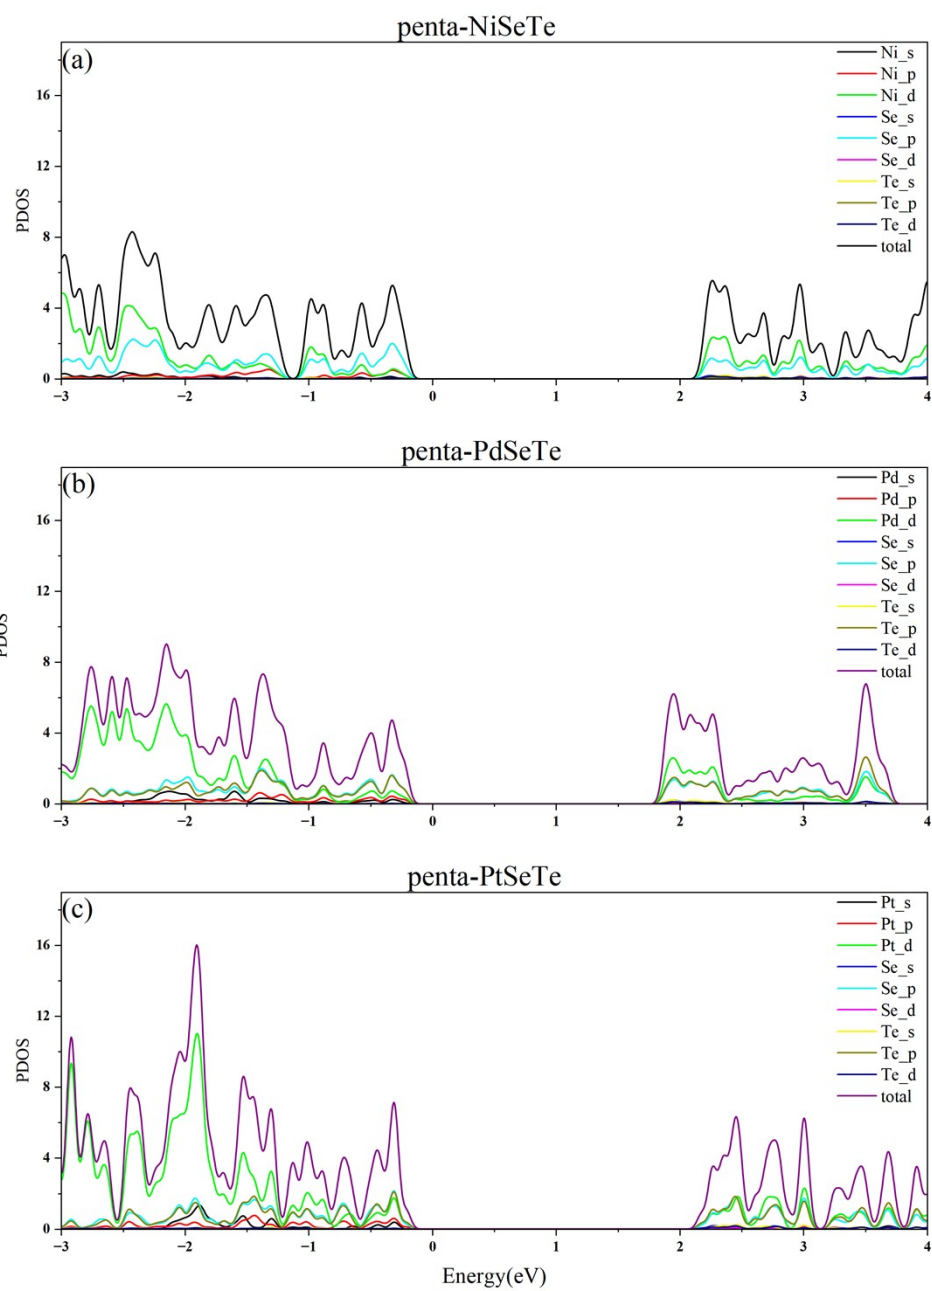

**Figure S5** The calculated partial density of states (DOS) with HSE06 functional of penta-MSeTe monolayers.

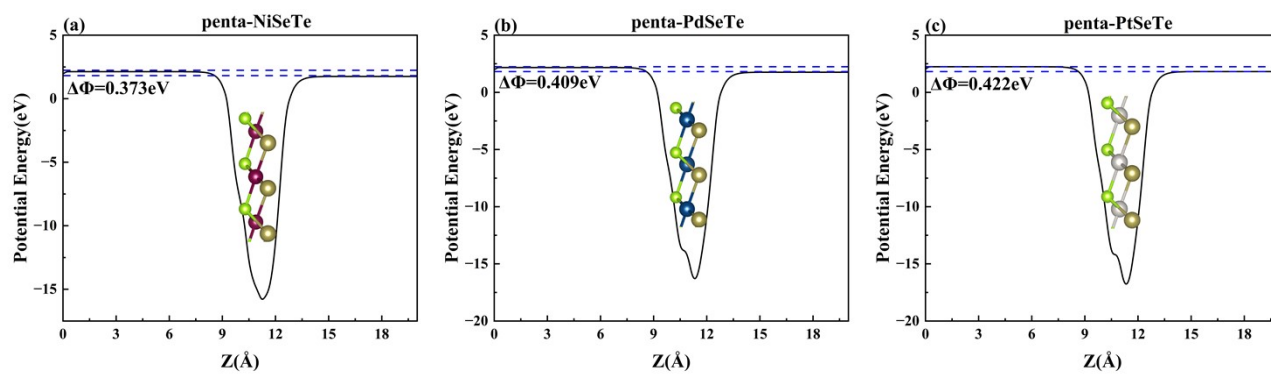

**Figure S6** The plane average electrostatic potentials of penta-MSeTe monolayers: (a) penta-NiSeTe, (b) penta-PdSeTe, and (c) penta-PtSeTe.



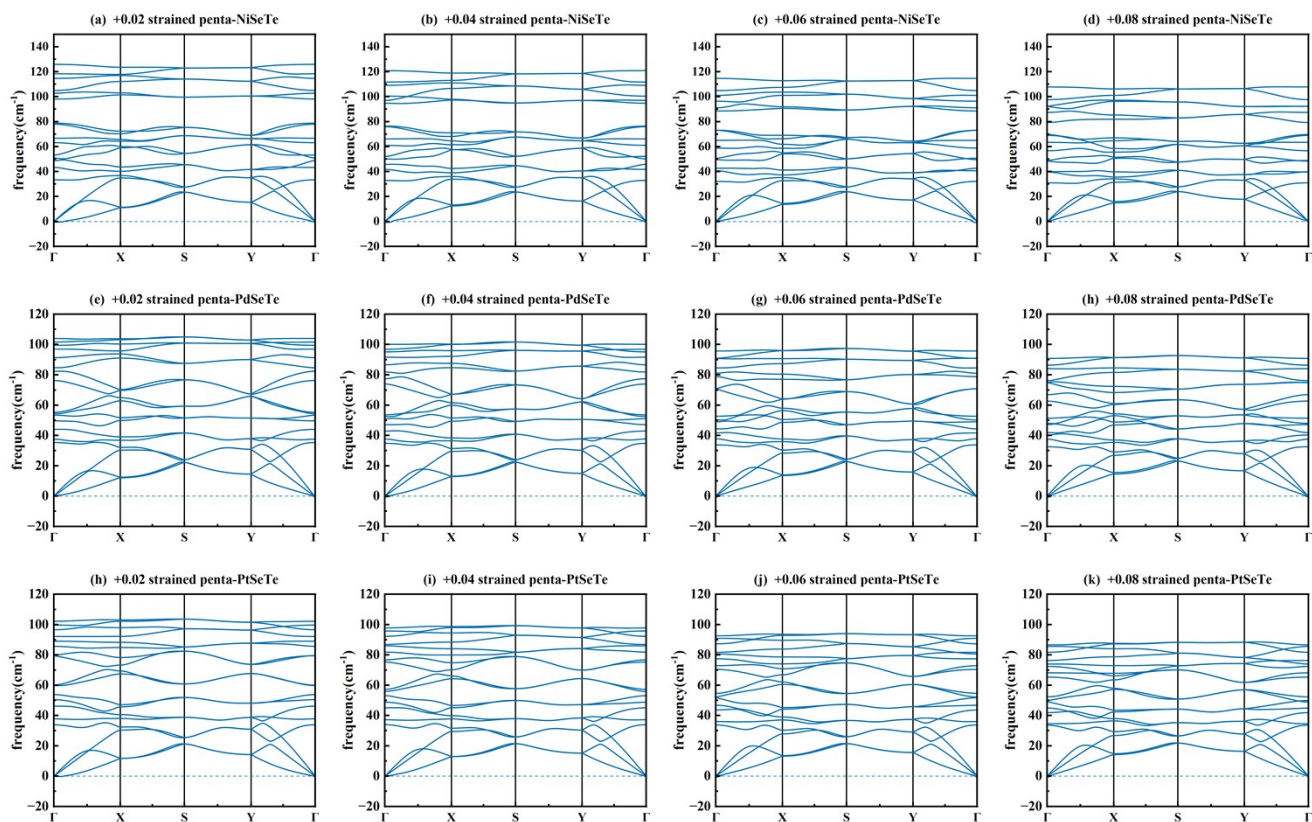

**Figure S7** The phonon dispersions of penta-MSeTe under +2% to +8% biaxial strain

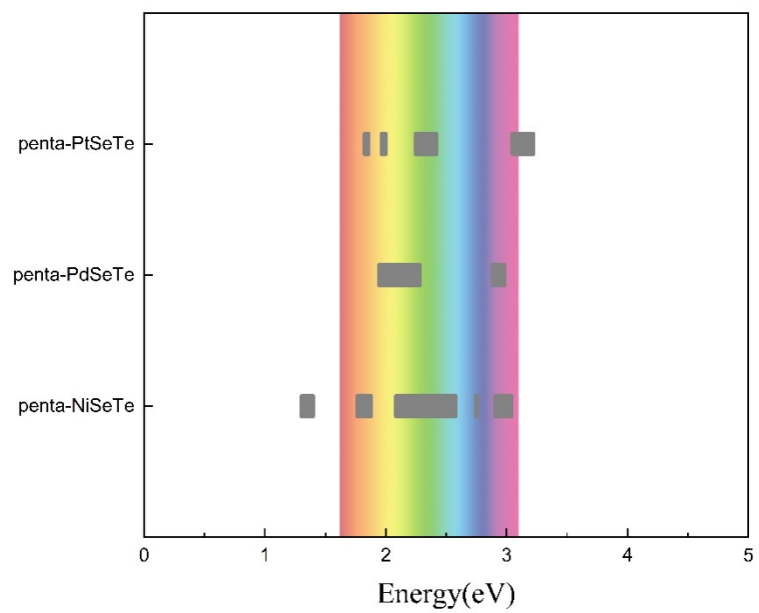

**Figure S8** The hyperbolic region marked in grey of penta-MSeTe. The visual spectrum is indicated in color.
